# Supplementary material for: Innovative Cost-Effective Nano-NiCo2O4 Cathode Catalysts for Oxygen Reduction in Air–Cathode Microbial Electrochemical Systems
Source: MDPI journal article supplement (doi:10.3390/ijerph191811609), 2022-09-15
Supplement: s1 [file s1]

## **Supplementary information**

### **Innovative cost-effective nano-NiCo<sub>2</sub>O<sub>4</sub> cathode catalysts for oxygen reduction in air-cathode microbial electrochemical systems**

Qixing Zhou\*, Ruixiang Li, Xiaolin Zhang, Tian Li

MOE Key Laboratory of Pollution Processes and Environmental Criteria / Tianjin Key Laboratory of Environmental Remediation and Pollution Control, College of Environmental Science and Engineering, Nankai University, No. 38 Tongyan Road, Jinnan District, Tianjin 300350, China

\* Corresponding author, e-mail: [zhouqx@nankai.edu.cn](mailto:zhouqx@nankai.edu.cn)

## **Table of Contents**

**Figure S1.** The linear sweep voltammetry of the cathodes with 0, 2%, and 5%  $\text{NiCo}_2\text{O}_4$ .

**Figure S2.** Cyclic voltammetry of the cathodes with 0, 2%, 5%  $\text{NiCo}_2\text{O}_4$  under 10 mV/s.

**Table S1.** The published data of different photocatalysts and their performance.

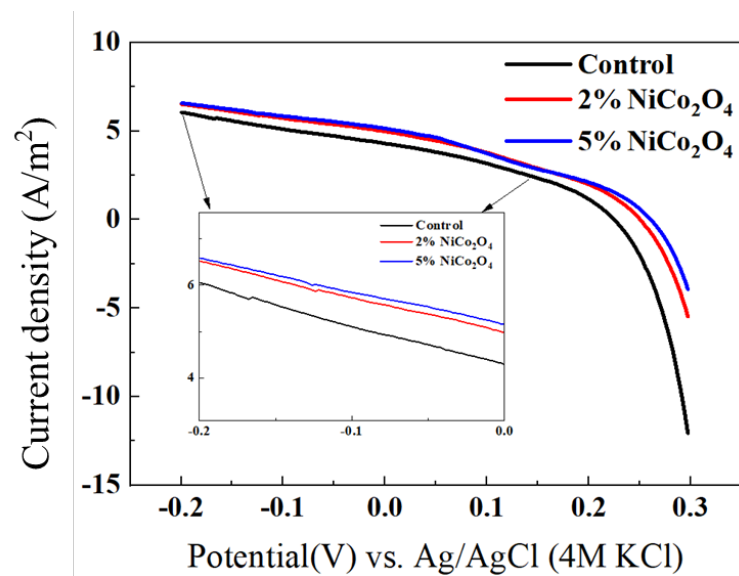

**Figure S1.** The linear sweep voltammetry of the cathodes with 0, 2%, and 5%  $\text{NiCo}_2\text{O}_4$ .

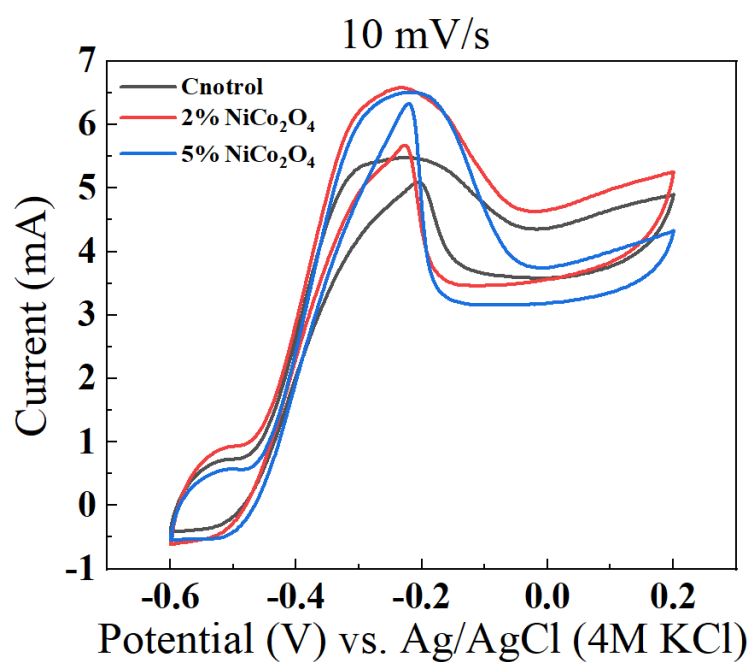

**Figure S2.** Cyclic voltammetry of the cathodes with 0, 2%, 5%  $\text{NiCo}_2\text{O}_4$  under 10 mV/s.

Table S1. The published data of different photocatalysts and their performance.

| MFC                   | Anode<br>materials              | Cathode<br>materials            | Cathode<br>catalysts                                      | Power<br>density             | Ref. |
|-----------------------|---------------------------------|---------------------------------|-----------------------------------------------------------|------------------------------|------|
| Dual-chamber<br>MFC   | Carbon felt/<br>stainless steel | Carbon felt/<br>stainless steel | Rhodium                                                   | 9.36<br>W/m <sup>3</sup>     | [1]  |
| Air-cathode<br>MFC    | Carbon cloth                    | Carbon cloth                    | Polypyrrole/<br>carbon black                              | 401.8<br>mW/m <sup>2</sup>   | [2]  |
| Single<br>chamber MFC | Carbon cloth                    | Carbon cloth                    | Polyaniline/<br>carbon black/<br>iron<br>phthalocyanine   | 630.5<br>mW/m <sup>2</sup>   | [3]  |
| Air-cathode<br>MFC    | Carbon felt                     | Carbon felt                     | SnO <sub>2</sub> /<br>Polyaniline                         | 65<br>mW/m <sup>2</sup>      | [4]  |
| Dual-chamber<br>MFC   | Carbon felt                     | Carbon cloth                    | $\alpha$ -Fe <sub>2</sub> O <sub>3</sub> /polyani<br>line | 1502.78<br>mW/m <sup>2</sup> | [5]  |
| Air-cathode<br>MFC    | Carbon felt                     | AC/ stainless<br>steel          | Co/N-C                                                    | 2514<br>mW/m <sup>2</sup>    | [6]  |
| Single<br>chamber MFC | Carbon fiber<br>brush           | Graphitic<br>carbon             | AgNPs/Fe <sub>3</sub> O <sub>4</sub>                      | 1712<br>mW/m <sup>2</sup>    | [7]  |
| Single<br>chamber MFC | stainless steel<br>wire mesh    | stainless steel<br>wire mesh    | V <sub>2</sub> O <sub>5</sub> /rGO                        | 533<br>mW/m <sup>2</sup>     | [8]  |
| Single                | Carbon felt                     | Carbon cloth                    | GO/MgO                                                    | 755.63                       | [9]  |

|             |                |                 |                                  |                   |         |
|-------------|----------------|-----------------|----------------------------------|-------------------|---------|
| chamber MFC |                |                 |                                  | mW/m <sup>2</sup> |         |
| Single      | Graphite felts | Carbon cloth    | cobalt oxide/N/                  | 713.6             | [10]    |
| chamber MFC |                |                 | graphene                         | mW/m <sup>2</sup> |         |
| Single      | Carbon felt    | Stainless-steel | CoFe <sub>2</sub> O <sub>4</sub> | 1771              | [11,12] |
| chamber MFC |                | mesh            |                                  | mW/m <sup>2</sup> |         |

## References for supporting information

1. Bhowmick, G.D.; Das, S.; Adhikary, K.; Ghangrekar, M.M.; Mitra, A. Using rhodium as a cathode catalyst for enhancing performance of microbial fuel cell. *Int. J. Hydrog. Energy* **2019**, *44*, 22218-22222, <https://doi.org/10.1016/j.ijhydene.2019.06.063>.
2. Yuan, Y.; Zhou, S.G.; Zhuang, L. Polypyrrole/carbon black composite as a novel oxygen reduction catalyst for microbial fuel cells. *Journal of Power Sources* **2010**, *195*, 3490-3493, <https://doi.org/10.1016/j.jpowsour.2009.12.026>.
3. Yuan, Y.; Ahmed, J.; Kim, S. Polyaniline/carbon black composite-supported iron phthalocyanine as an oxygen reduction catalyst for microbial fuel cells. *Journal of Power Sources* **2011**, *196*, 1103-1106, <https://doi.org/10.1016/j.jpowsour.2010.08.112>.
4. Tiwari, A.K.; Jain, S.; Mungray, A.A.; Mungray, A.K. SnO<sub>2</sub>:PANI modified cathode for performance enhancement of air-cathode microbial fuel cell. *J. Environ. Chem. Eng.* **2020**, *8*, 8, <https://doi.org/10.1016/j.jece.2019.103590>.
5. Li, M.; Zhou, S.Q. alpha-Fe<sub>2</sub>O<sub>3</sub>/polyaniline nanocomposites as an effective catalyst for improving the electrochemical performance of microbial fuel cell. *Chem. Eng. J.* **2018**, *339*, 539-546, <https://doi.org/10.1016/j.cej.2018.02.002>.
6. Yang, T.; Li, K.; Pu, L.; Liu, Z.; Ge, B.; Pan, Y.; Liu, Y. Hollow-spherical Co/N-C nanoparticle as an efficient electrocatalyst used in air cathode microbial fuel cell. *Biosens. Bioelectron.* **2016**, *86*, 129-134, <https://doi.org/10.1016/j.bios.2016.06.032>.
7. Ma, M.; You, S.; Gong, X.; Dai, Y.; Zou, J.; Fu, H. Silver/iron oxide/graphitic carbon composites as bacteriostatic catalysts for enhancing oxygen reduction in microbial fuel cells. *Journal of Power Sources* **2015**, *283*, 74-83, <https://doi.org/10.1016/j.jpowsour.2015.02.100>.
8. Noori, M.T.; Mukherjee, C.K.; Ghangrekar, M.M. Enhancing performance of microbial fuel cell by using graphene supported V<sub>2</sub>O<sub>5</sub>-nanorod catalytic cathode. *Electrochim. Acta* **2017**, *228*, 513-521, <https://doi.org/10.1016/j.electacta.2017.01.016>.
9. Xin, S.S.; Shen, J.G.; Liu, G.C.; Chen, Q.H.; Xiao, Z.; Zhang, G.D.; Xin, Y.J. Electricity generation and microbial community of single-chamber microbial fuel cells in response to Cu<sub>2</sub>O nanoparticles/reduced graphene oxide as cathode catalyst. *Chem. Eng. J.* **2020**, *380*, 9, <https://doi.org/10.1016/j.cej.2019.122446>.
10. Cao, C.; Wei, L.; Su, M.; Wang, G.; Shen, J. Enhanced power generation using nano cobalt oxide anchored nitrogen-decorated reduced graphene oxide as a high-performance air-cathode electrocatalyst in biofuel cells. *RSC Adv.* **2016**, *6*, 52556-52563, <https://doi.org/10.1039/c6ra11095a>.
11. Zhou, Q.; Ma, S.; Zhan, S. Superior photocatalytic disinfection of Ag-3D ordered mesoporous CeO<sub>2</sub> under visible light condition. *Appl. Catal. B Environ.* **2018**, *224*, 27-37. <https://doi.org/10.1016/j.apcatb.2017.10.032>

12. Huang, Q.S.; Zhou, P.J.; Yang, H.; Zhu, L.L.; Wu, H.Y. In situ generation of inverse spinel CoFe<sub>2</sub>O<sub>4</sub> nanoparticles onto nitrogen-doped activated carbon for an effective cathode electrocatalyst of microbial fuel cells. *Chem. Eng. J.* **2017**, 325, 466-473, <https://doi.org/10.1016/j.cej.2017.05.079>.
